# Supplementary material for: Influence of fluoro and cyano substituents in the aromatic and antiaromatic characteristics of cyclooctatetraene
Source: Royal Society of Chemistry journal article supplement (doi:10.1039/c5cp00876j), 2015-01-01
Supplement: c5cp00876j1.pdf [file c5cp00876j1.pdf]

## Supplementary Information

---

### Influence of fluoro and cyano substituents in the aromatic and antiaromatic characteristics of cyclooctatetraene

Goar Sánchez-Sanz,<sup>a,\*</sup> Cristina Trujillo,<sup>b</sup> Isabel Rozas,<sup>b</sup> Ibon Alkorta<sup>c</sup>

<sup>a</sup> *School of Physics & Complex and Adaptive Systems Laboratory, University College Dublin, Belfield, Dublin 4, Ireland*

<sup>b</sup> *School of Chemistry, Trinity Biomedical Sciences Institute, Trinity College Dublin, 152-160 Pearse St., Dublin 2, Ireland*

<sup>c</sup> *Instituto de Química Médica, CSIC, Juan de la Cierva, 3, E-28006 Madrid, Spain*

---

### Table of Contents

- **Table S1.** Carbon-carbon ring distances, in Å, for all compounds studied at B3LYP/6-311++G(d,p) computational level.
- **Table S2.** Wiberg indexes for all the compounds studied at B3LYP/6-311++G(d,p) computational level.
- **Table S3.** NICS values (ppm) and HOMA indexes for all the compounds studied at B3LYP/6-311++G(d,p) computational level.
- **Figure S1.** Evolution of the C-C distance upon substitution of the ring, for triplet and transition state in F and CN compounds.

**Table S1.** Carbon-carbon ring distances, in Å, for all compounds studied at B3LYP/6-311++G(d,p) computational level.

|                   | Sym             | C1-C2 | C2-C3 | C3-C4 | C4-C5 | C5-C6 | C6-C7 | C7-C8 | C8-C1 |
|-------------------|-----------------|-------|-------|-------|-------|-------|-------|-------|-------|
| 1COT <sub>S</sub> | D <sub>2d</sub> | 1.472 | 1.340 | 1.472 | 1.340 | 1.472 | 1.340 | 1.472 | 1.340 |
| 2F <sub>1S</sub>  | C <sub>1</sub>  | 1.466 | 1.338 | 1.470 | 1.340 | 1.471 | 1.340 | 1.469 | 1.332 |
| 3F <sub>2S</sub>  | C <sub>2</sub>  | 1.469 | 1.330 | 1.468 | 1.341 | 1.469 | 1.341 | 1.468 | 1.330 |
| 4F <sub>2S</sub>  | C <sub>1</sub>  | 1.461 | 1.332 | 1.465 | 1.339 | 1.468 | 1.341 | 1.467 | 1.333 |
| 5F <sub>2S</sub>  | C <sub>S</sub>  | 1.466 | 1.336 | 1.466 | 1.332 | 1.468 | 1.340 | 1.468 | 1.332 |
| 6F <sub>2S</sub>  | C <sub>2</sub>  | 1.465 | 1.339 | 1.466 | 1.334 | 1.465 | 1.339 | 1.466 | 1.334 |
| 7F <sub>3S</sub>  | C <sub>1</sub>  | 1.464 | 1.334 | 1.462 | 1.340 | 1.466 | 1.343 | 1.465 | 1.332 |
| 8F <sub>3S</sub>  | C <sub>1</sub>  | 1.470 | 1.330 | 1.461 | 1.333 | 1.465 | 1.341 | 1.466 | 1.331 |
| 9F <sub>3S</sub>  | C <sub>1</sub>  | 1.469 | 1.331 | 1.463 | 1.334 | 1.464 | 1.339 | 1.466 | 1.331 |
| 10F <sub>3S</sub> | C <sub>1</sub>  | 1.459 | 1.333 | 1.459 | 1.334 | 1.463 | 1.340 | 1.463 | 1.335 |
| 11F <sub>3S</sub> | C <sub>1</sub>  | 1.461 | 1.332 | 1.466 | 1.336 | 1.464 | 1.334 | 1.463 | 1.333 |
| 12F <sub>4S</sub> | C <sub>S</sub>  | 1.464 | 1.332 | 1.464 | 1.333 | 1.463 | 1.344 | 1.463 | 1.333 |
| 13F <sub>4S</sub> | C <sub>1</sub>  | 1.463 | 1.335 | 1.457 | 1.335 | 1.461 | 1.341 | 1.462 | 1.333 |
| 14F <sub>4S</sub> | C <sub>1</sub>  | 1.464 | 1.334 | 1.462 | 1.338 | 1.462 | 1.336 | 1.461 | 1.332 |
| 15F <sub>4S</sub> | C <sub>1</sub>  | 1.469 | 1.330 | 1.458 | 1.337 | 1.460 | 1.340 | 1.463 | 1.333 |
| 16F <sub>4S</sub> | D <sub>2</sub>  | 1.469 | 1.332 | 1.463 | 1.332 | 1.469 | 1.332 | 1.463 | 1.332 |
| 17F <sub>4S</sub> | C <sub>1</sub>  | 1.469 | 1.331 | 1.461 | 1.333 | 1.458 | 1.335 | 1.461 | 1.332 |
| 18F <sub>4S</sub> | C <sub>2</sub>  | 1.472 | 1.330 | 1.460 | 1.334 | 1.461 | 1.334 | 1.460 | 1.330 |
| 19F <sub>4S</sub> | S <sub>4</sub>  | 1.456 | 1.335 | 1.456 | 1.335 | 1.456 | 1.335 | 1.456 | 1.335 |
| 20F <sub>5S</sub> | C <sub>1</sub>  | 1.462 | 1.333 | 1.458 | 1.337 | 1.458 | 1.343 | 1.459 | 1.335 |
| 21F <sub>5S</sub> | C <sub>1</sub>  | 1.463 | 1.333 | 1.465 | 1.332 | 1.457 | 1.337 | 1.458 | 1.334 |
| 22F <sub>5S</sub> | C <sub>1</sub>  | 1.463 | 1.335 | 1.458 | 1.332 | 1.468 | 1.334 | 1.459 | 1.334 |
| 23F <sub>5S</sub> | C <sub>1</sub>  | 1.462 | 1.337 | 1.454 | 1.336 | 1.455 | 1.336 | 1.457 | 1.333 |
| 24F <sub>5S</sub> | C <sub>1</sub>  | 1.470 | 1.331 | 1.456 | 1.338 | 1.455 | 1.334 | 1.459 | 1.332 |
| 25F <sub>6S</sub> | C <sub>2</sub>  | 1.462 | 1.335 | 1.459 | 1.335 | 1.462 | 1.337 | 1.455 | 1.337 |
| 26F <sub>6S</sub> | C <sub>1</sub>  | 1.463 | 1.335 | 1.457 | 1.338 | 1.452 | 1.338 | 1.455 | 1.334 |
| 27F <sub>6S</sub> | C <sub>S</sub>  | 1.464 | 1.335 | 1.464 | 1.333 | 1.454 | 1.341 | 1.454 | 1.333 |
| 28F <sub>6S</sub> | C <sub>2</sub>  | 1.462 | 1.338 | 1.455 | 1.334 | 1.462 | 1.338 | 1.455 | 1.334 |
| 29F <sub>7S</sub> | C <sub>1</sub>  | 1.462 | 1.337 | 1.458 | 1.336 | 1.456 | 1.341 | 1.452 | 1.336 |
| 30F <sub>8S</sub> | D <sub>2D</sub> | 1.457 | 1.339 | 1.457 | 1.339 | 1.457 | 1.339 | 1.457 | 1.339 |
|                   |                 |       |       |       |       |       |       |       |       |
| 1COT <sub>T</sub> | D <sub>8h</sub> | 1.404 | 1.404 | 1.404 | 1.404 | 1.404 | 1.404 | 1.404 | 1.404 |

|                    |                 |       |       |       |       |       |       |       |       |
|--------------------|-----------------|-------|-------|-------|-------|-------|-------|-------|-------|
| 2F <sub>1T</sub>   | C <sub>2v</sub> | 1.397 | 1.398 | 1.405 | 1.403 | 1.403 | 1.405 | 1.398 | 1.397 |
| 3F <sub>2T</sub>   | C <sub>2v</sub> | 1.407 | 1.394 | 1.400 | 1.403 | 1.402 | 1.403 | 1.400 | 1.394 |
| 4F <sub>2T</sub>   | C <sub>2v</sub> | 1.392 | 1.392 | 1.398 | 1.398 | 1.404 | 1.404 | 1.398 | 1.398 |
| 5F <sub>2T</sub>   | C <sub>2v</sub> | 1.399 | 1.392 | 1.399 | 1.397 | 1.397 | 1.407 | 1.397 | 1.397 |
| 6F <sub>2T</sub>   | D <sub>2H</sub> | 1.396 | 1.399 | 1.399 | 1.396 | 1.396 | 1.399 | 1.399 | 1.396 |
| 7F <sub>3T</sub>   | C <sub>2v</sub> | 1.405 | 1.405 | 1.395 | 1.399 | 1.402 | 1.402 | 1.399 | 1.395 |
| 8F <sub>3T</sub>   | C <sub>s</sub>  | 1.409 | 1.389 | 1.394 | 1.397 | 1.396 | 1.405 | 1.398 | 1.394 |
| 9F <sub>3T</sub>   | C <sub>s</sub>  | 1.407 | 1.396 | 1.394 | 1.397 | 1.395 | 1.398 | 1.401 | 1.392 |
| 10F <sub>3T</sub>  | C <sub>2v</sub> | 1.391 | 1.393 | 1.393 | 1.391 | 1.397 | 1.400 | 1.400 | 1.397 |
| 11F <sub>3T</sub>  | C <sub>2v</sub> | 1.391 | 1.391 | 1.400 | 1.392 | 1.399 | 1.399 | 1.392 | 1.400 |
| 12F <sub>4T</sub>  | C <sub>2v</sub> | 1.407 | 1.403 | 1.407 | 1.394 | 1.397 | 1.402 | 1.397 | 1.394 |
| 13F <sub>4T</sub>  | C <sub>s</sub>  | 1.405 | 1.407 | 1.389 | 1.393 | 1.395 | 1.397 | 1.401 | 1.393 |
| 14F <sub>4T</sub>  | C <sub>2v</sub> | 1.404 | 1.404 | 1.397 | 1.393 | 1.396 | 1.396 | 1.393 | 1.397 |
| 15F <sub>4T</sub>  | C <sub>s</sub>  | 1.407 | 1.391 | 1.391 | 1.407 | 1.392 | 1.399 | 1.399 | 1.392 |
| 16F <sub>4T</sub>  | D <sub>2H</sub> | 1.405 | 1.394 | 1.396 | 1.394 | 1.405 | 1.394 | 1.396 | 1.394 |
| 17F <sub>4T</sub>  | C <sub>s</sub>  | 1.409 | 1.388 | 1.395 | 1.392 | 1.390 | 1.399 | 1.393 | 1.396 |
| 18F <sub>4T</sub>  | C <sub>2v</sub> | 1.410 | 1.389 | 1.393 | 1.399 | 1.391 | 1.399 | 1.393 | 1.389 |
| 19F <sub>4T</sub>  | C <sub>2v</sub> | 1.393 | 1.393 | 1.393 | 1.393 | 1.393 | 1.393 | 1.393 | 1.393 |
| 20F <sub>5T</sub>  | C <sub>2v</sub> | 1.406 | 1.405 | 1.405 | 1.406 | 1.392 | 1.397 | 1.397 | 1.392 |
| 21F <sub>5T</sub>  | C <sub>s</sub>  | 1.406 | 1.403 | 1.409 | 1.389 | 1.391 | 1.396 | 1.391 | 1.397 |
| 22F <sub>5T</sub>  | C <sub>s</sub>  | 1.403 | 1.405 | 1.392 | 1.390 | 1.405 | 1.393 | 1.394 | 1.395 |
| 23F <sub>5T</sub>  | C <sub>2v</sub> | 1.407 | 1.407 | 1.389 | 1.395 | 1.390 | 1.390 | 1.395 | 1.389 |
| 24F <sub>5T</sub>  | C <sub>2v</sub> | 1.409 | 1.391 | 1.391 | 1.409 | 1.388 | 1.394 | 1.394 | 1.388 |
| 25F <sub>6T</sub>  | C <sub>2v</sub> | 1.404 | 1.404 | 1.407 | 1.404 | 1.404 | 1.393 | 1.393 | 1.393 |
| 26F <sub>6T</sub>  | C <sub>2v</sub> | 1.408 | 1.404 | 1.404 | 1.408 | 1.387 | 1.392 | 1.392 | 1.387 |
| 27F <sub>6T</sub>  | C <sub>2v</sub> | 1.407 | 1.401 | 1.407 | 1.391 | 1.388 | 1.407 | 1.388 | 1.391 |
| 28F <sub>6T</sub>  | C <sub>2v</sub> | 1.404 | 1.404 | 1.391 | 1.391 | 1.404 | 1.404 | 1.391 | 1.391 |
| 29F <sub>7T</sub>  | C <sub>2v</sub> | 1.405 | 1.403 | 1.406 | 1.406 | 1.403 | 1.405 | 1.389 | 1.389 |
| 30F <sub>8T</sub>  | D <sub>2d</sub> | 1.403 | 1.403 | 1.403 | 1.403 | 1.403 | 1.403 | 1.403 | 1.403 |
|                    |                 |       |       |       |       |       |       |       |       |
| 1COT <sub>TS</sub> | D <sub>2h</sub> | 1.343 | 1.474 | 1.343 | 1.474 | 1.343 | 1.474 | 1.343 | 1.474 |
| 2F <sub>1TS</sub>  | C <sub>s</sub>  | 1.344 | 1.472 | 1.344 | 1.467 | 1.335 | 1.469 | 1.340 | 1.474 |
| 3F <sub>2TS</sub>  | C <sub>2v</sub> | 1.340 | 1.465 | 1.341 | 1.473 | 1.344 | 1.473 | 1.341 | 1.465 |
| 4F <sub>2TS</sub>  | C <sub>s</sub>  | 1.335 | 1.461 | 1.337 | 1.464 | 1.346 | 1.470 | 1.342 | 1.468 |
| 5F <sub>2TS</sub>  | C <sub>2v</sub> | 1.335 | 1.462 | 1.335 | 1.468 | 1.341 | 1.474 | 1.341 | 1.468 |

|                    |                 |       |       |       |       |       |       |       |       |
|--------------------|-----------------|-------|-------|-------|-------|-------|-------|-------|-------|
| 6F <sub>2TS</sub>  | C <sub>2h</sub> | 1.338 | 1.464 | 1.342 | 1.467 | 1.338 | 1.464 | 1.342 | 1.467 |
| 7F <sub>3TS</sub>  | C <sub>s</sub>  | 1.341 | 1.480 | 1.336 | 1.466 | 1.343 | 1.469 | 1.341 | 1.466 |
| 8F <sub>3TS</sub>  | C <sub>s</sub>  | 1.341 | 1.460 | 1.334 | 1.468 | 1.341 | 1.472 | 1.342 | 1.462 |
| 9F <sub>3TS</sub>  | C <sub>s</sub>  | 1.342 | 1.463 | 1.338 | 1.468 | 1.336 | 1.466 | 1.341 | 1.464 |
| 10F <sub>3TS</sub> | C <sub>s</sub>  | 1.338 | 1.458 | 1.338 | 1.457 | 1.340 | 1.460 | 1.344 | 1.464 |
| 11F <sub>3TS</sub> | C <sub>s</sub>  | 1.334 | 1.462 | 1.336 | 1.461 | 1.336 | 1.467 | 1.338 | 1.470 |
| 12F <sub>4TS</sub> | C <sub>2v</sub> | 1.341 | 1.480 | 1.341 | 1.464 | 1.340 | 1.469 | 1.340 | 1.464 |
| 13F <sub>4TS</sub> | C <sub>s</sub>  | 1.343 | 1.478 | 1.335 | 1.460 | 1.337 | 1.461 | 1.342 | 1.464 |
| 14F <sub>4TS</sub> | C <sub>s</sub>  | 1.342 | 1.481 | 1.335 | 1.461 | 1.335 | 1.465 | 1.338 | 1.465 |
| 15F <sub>4TS</sub> | C <sub>s</sub>  | 1.341 | 1.459 | 1.333 | 1.483 | 1.335 | 1.466 | 1.341 | 1.462 |
| 16F <sub>4TS</sub> | D <sub>2h</sub> | 1.341 | 1.463 | 1.339 | 1.463 | 1.341 | 1.463 | 1.339 | 1.463 |
| 17F <sub>4TS</sub> | C <sub>s</sub>  | 1.343 | 1.458 | 1.336 | 1.460 | 1.336 | 1.467 | 1.340 | 1.458 |
| 18F <sub>4TS</sub> | C <sub>2v</sub> | 1.341 | 1.459 | 1.334 | 1.468 | 1.338 | 1.468 | 1.334 | 1.459 |
| 19F <sub>4TS</sub> | C <sub>4h</sub> | 1.341 | 1.453 | 1.341 | 1.453 | 1.341 | 1.453 | 1.341 | 1.453 |
| 20F <sub>5TS</sub> | C <sub>s</sub>  | 1.341 | 1.480 | 1.343 | 1.480 | 1.336 | 1.462 | 1.340 | 1.462 |
| 21F <sub>5TS</sub> | C <sub>s</sub>  | 1.343 | 1.478 | 1.342 | 1.459 | 1.334 | 1.464 | 1.338 | 1.462 |
| 22F <sub>5TS</sub> | C <sub>s</sub>  | 1.341 | 1.477 | 1.336 | 1.460 | 1.335 | 1.480 | 1.334 | 1.460 |
| 23F <sub>5TS</sub> | C <sub>s</sub>  | 1.345 | 1.473 | 1.338 | 1.457 | 1.337 | 1.455 | 1.338 | 1.455 |
| 24F <sub>5TS</sub> | C <sub>s</sub>  | 1.341 | 1.457 | 1.334 | 1.483 | 1.334 | 1.462 | 1.334 | 1.457 |
| 25F <sub>6TS</sub> | C <sub>2v</sub> | 1.334 | 1.478 | 1.343 | 1.482 | 1.343 | 1.478 | 1.334 | 1.457 |
| 26F <sub>6TS</sub> | C <sub>s</sub>  | 1.343 | 1.477 | 1.345 | 1.477 | 1.335 | 1.457 | 1.335 | 1.455 |
| 27F <sub>6TS</sub> | C <sub>2v</sub> | 1.342 | 1.477 | 1.342 | 1.458 | 1.333 | 1.480 | 1.333 | 1.458 |
| 28F <sub>6TS</sub> | C <sub>2h</sub> | 1.342 | 1.474 | 1.336 | 1.457 | 1.342 | 1.474 | 1.336 | 1.457 |
| 29F <sub>7TS</sub> | C <sub>s</sub>  | 1.341 | 1.475 | 1.343 | 1.479 | 1.343 | 1.476 | 1.333 | 1.455 |
| 30F <sub>8TS</sub> | D <sub>4h</sub> | 1.342 | 1.476 | 1.342 | 1.476 | 1.342 | 1.476 | 1.342 | 1.476 |
|                    |                 |       |       |       |       |       |       |       |       |
| 2CN <sub>1S</sub>  | C <sub>1</sub>  | 1.485 | 1.336 | 1.471 | 1.339 | 1.470 | 1.341 | 1.466 | 1.348 |
| 3CN <sub>2S</sub>  | C <sub>2</sub>  | 1.500 | 1.345 | 1.464 | 1.342 | 1.469 | 1.342 | 1.464 | 1.345 |
| 4CN <sub>2S</sub>  | C <sub>1</sub>  | 1.480 | 1.344 | 1.484 | 1.336 | 1.469 | 1.341 | 1.464 | 1.350 |
| 5CN <sub>2S</sub>  | C <sub>s</sub>  | 1.484 | 1.334 | 1.484 | 1.348 | 1.465 | 1.342 | 1.465 | 1.348 |
| 6CN <sub>2S</sub>  | C <sub>2</sub>  | 1.484 | 1.337 | 1.465 | 1.348 | 1.484 | 1.337 | 1.465 | 1.348 |
| 7CN <sub>3S</sub>  | C <sub>1</sub>  | 1.499 | 1.355 | 1.479 | 1.339 | 1.467 | 1.342 | 1.462 | 1.346 |
| 8CN <sub>3S</sub>  | C <sub>1</sub>  | 1.499 | 1.342 | 1.479 | 1.350 | 1.463 | 1.342 | 1.464 | 1.345 |
| 9CN <sub>3S</sub>  | C <sub>1</sub>  | 1.499 | 1.346 | 1.460 | 1.349 | 1.482 | 1.338 | 1.464 | 1.345 |
| 10CN <sub>3S</sub> | C <sub>1</sub>  | 1.479 | 1.345 | 1.480 | 1.344 | 1.483 | 1.338 | 1.464 | 1.349 |

|                    |                 |       |       |       |       |       |       |       |       |
|--------------------|-----------------|-------|-------|-------|-------|-------|-------|-------|-------|
| 11CN <sub>3S</sub> | C <sub>1</sub>  | 1.479 | 1.344 | 1.483 | 1.334 | 1.482 | 1.349 | 1.460 | 1.350 |
| 12CN <sub>4S</sub> | C <sub>s</sub>  | 1.497 | 1.352 | 1.497 | 1.347 | 1.462 | 1.344 | 1.462 | 1.347 |
| 13CN <sub>4S</sub> | C <sub>1</sub>  | 1.497 | 1.356 | 1.477 | 1.346 | 1.481 | 1.339 | 1.463 | 1.346 |
| 14CN <sub>4S</sub> | C <sub>1</sub>  | 1.498 | 1.355 | 1.480 | 1.336 | 1.481 | 1.350 | 1.459 | 1.347 |
| 15CN <sub>4S</sub> | C <sub>1</sub>  | 1.497 | 1.343 | 1.477 | 1.360 | 1.479 | 1.339 | 1.463 | 1.346 |
| 16CN <sub>4S</sub> | D <sub>2</sub>  | 1.498 | 1.346 | 1.461 | 1.346 | 1.498 | 1.346 | 1.461 | 1.346 |
| 17CN <sub>4S</sub> | C <sub>1</sub>  | 1.498 | 1.342 | 1.479 | 1.346 | 1.478 | 1.351 | 1.459 | 1.346 |
| 18CN <sub>4S</sub> | C <sub>2</sub>  | 1.499 | 1.342 | 1.478 | 1.351 | 1.458 | 1.351 | 1.478 | 1.342 |
| 19CN <sub>4S</sub> | S <sub>4</sub>  | 1.479 | 1.346 | 1.479 | 1.346 | 1.479 | 1.346 | 1.479 | 1.346 |
| 20CN <sub>5S</sub> | C <sub>1</sub>  | 1.494 | 1.353 | 1.497 | 1.357 | 1.477 | 1.341 | 1.461 | 1.348 |
| 21CN <sub>5S</sub> | C <sub>1</sub>  | 1.496 | 1.352 | 1.497 | 1.344 | 1.476 | 1.352 | 1.458 | 1.348 |
| 22CN <sub>5S</sub> | C <sub>1</sub>  | 1.496 | 1.357 | 1.477 | 1.344 | 1.497 | 1.347 | 1.459 | 1.347 |
| 23CN <sub>5S</sub> | C <sub>1</sub>  | 1.497 | 1.356 | 1.476 | 1.347 | 1.477 | 1.347 | 1.477 | 1.343 |
| 24CN <sub>5S</sub> | C <sub>1</sub>  | 1.497 | 1.343 | 1.476 | 1.361 | 1.475 | 1.347 | 1.477 | 1.343 |
| 25CN <sub>6S</sub> | C <sub>2</sub>  | 1.494 | 1.354 | 1.496 | 1.354 | 1.494 | 1.349 | 1.458 | 1.349 |
| 26CN <sub>6S</sub> | C <sub>1</sub>  | 1.495 | 1.353 | 1.496 | 1.358 | 1.474 | 1.349 | 1.476 | 1.345 |
| 27CN <sub>6S</sub> | C <sub>s</sub>  | 1.496 | 1.353 | 1.496 | 1.345 | 1.474 | 1.362 | 1.474 | 1.345 |
| 28CN <sub>6S</sub> | C <sub>2</sub>  | 1.496 | 1.357 | 1.475 | 1.344 | 1.496 | 1.357 | 1.475 | 1.344 |
| 29CN <sub>7S</sub> | C <sub>1</sub>  | 1.495 | 1.355 | 1.495 | 1.355 | 1.494 | 1.359 | 1.474 | 1.346 |
| 30CN <sub>8S</sub> | D <sub>2D</sub> | 1.493 | 1.357 | 1.493 | 1.357 | 1.493 | 1.357 | 1.493 | 1.357 |
|                    |                 |       |       |       |       |       |       |       |       |
| 2CN <sub>1T</sub>  | C <sub>2v</sub> | 1.418 | 1.395 | 1.406 | 1.400 | 1.400 | 1.406 | 1.395 | 1.418 |
| 3CN <sub>2T</sub>  | C <sub>2v</sub> | 1.434 | 1.413 | 1.398 | 1.403 | 1.396 | 1.403 | 1.398 | 1.413 |
| 4CN <sub>2T</sub>  | C <sub>2v</sub> | 1.409 | 1.409 | 1.420 | 1.394 | 1.403 | 1.403 | 1.394 | 1.420 |
| 5CN <sub>2T</sub>  | C <sub>2v</sub> | 1.421 | 1.388 | 1.421 | 1.415 | 1.392 | 1.409 | 1.392 | 1.415 |
| 6CN <sub>2T</sub>  | D <sub>2h</sub> | 1.414 | 1.398 | 1.398 | 1.414 | 1.414 | 1.398 | 1.398 | 1.414 |
| 7CN <sub>3T</sub>  | C <sub>2v</sub> | 1.431 | 1.431 | 1.416 | 1.396 | 1.398 | 1.398 | 1.396 | 1.416 |
| 8CN <sub>3T</sub>  | C <sub>s</sub>  | 1.437 | 1.406 | 1.412 | 1.417 | 1.389 | 1.405 | 1.394 | 1.412 |
| 9CN <sub>3T</sub>  | C <sub>s</sub>  | 1.431 | 1.417 | 1.391 | 1.416 | 1.410 | 1.395 | 1.402 | 1.409 |
| 10CN <sub>3T</sub> | C <sub>2v</sub> | 1.405 | 1.410 | 1.410 | 1.405 | 1.417 | 1.396 | 1.396 | 1.417 |
| 11CN <sub>3T</sub> | C <sub>2v</sub> | 1.406 | 1.406 | 1.424 | 1.385 | 1.418 | 1.418 | 1.385 | 1.424 |
| 12CN <sub>4T</sub> | C <sub>2v</sub> | 1.435 | 1.429 | 1.435 | 1.414 | 1.391 | 1.400 | 1.391 | 1.414 |
| 13CN <sub>4T</sub> | C <sub>s</sub>  | 1.429 | 1.435 | 1.408 | 1.409 | 1.412 | 1.391 | 1.399 | 1.412 |
| 14CN <sub>4T</sub> | C <sub>2v</sub> | 1.427 | 1.427 | 1.420 | 1.388 | 1.412 | 1.412 | 1.388 | 1.420 |
| 15CN <sub>4T</sub> | C <sub>s</sub>  | 1.433 | 1.409 | 1.409 | 1.433 | 1.406 | 1.397 | 1.398 | 1.406 |

|                     |                 |       |       |       |       |       |       |       |       |
|---------------------|-----------------|-------|-------|-------|-------|-------|-------|-------|-------|
| 16CN <sub>4T</sub>  | D <sub>2h</sub> | 1.426 | 1.412 | 1.394 | 1.412 | 1.426 | 1.412 | 1.394 | 1.412 |
| 17CN <sub>4T</sub>  | C <sub>s</sub>  | 1.434 | 1.402 | 1.416 | 1.409 | 1.403 | 1.419 | 1.388 | 1.415 |
| 18CN <sub>4T</sub>  | C <sub>2v</sub> | 1.441 | 1.403 | 1.409 | 1.420 | 1.382 | 1.420 | 1.409 | 1.403 |
| 19CN <sub>4T</sub>  | C <sub>2v</sub> | 1.408 | 1.407 | 1.407 | 1.408 | 1.410 | 1.409 | 1.409 | 1.410 |
| 20CN <sub>5T</sub>  | C <sub>2</sub>  | 1.434 | 1.431 | 1.431 | 1.434 | 1.406 | 1.393 | 1.393 | 1.406 |
| 21CN <sub>5T</sub>  | C <sub>s</sub>  | 1.431 | 1.426 | 1.439 | 1.406 | 1.404 | 1.414 | 1.384 | 1.417 |
| 22CN <sub>5T</sub>  | C <sub>s</sub>  | 1.423 | 1.430 | 1.413 | 1.405 | 1.429 | 1.408 | 1.391 | 1.415 |
| 23CN <sub>5T</sub>  | C <sub>2v</sub> | 1.432 | 1.432 | 1.405 | 1.413 | 1.404 | 1.404 | 1.413 | 1.405 |
| 24CN <sub>5T</sub>  | C <sub>2v</sub> | 1.437 | 1.406 | 1.406 | 1.437 | 1.399 | 1.412 | 1.412 | 1.399 |
| 25CN <sub>6T</sub>  | C <sub>s</sub>  | 1.425 | 1.432 | 1.431 | 1.432 | 1.425 | 1.409 | 1.388 | 1.409 |
| 26CN <sub>6T</sub>  | C <sub>2</sub>  | 1.441 | 1.426 | 1.426 | 1.441 | 1.397 | 1.409 | 1.409 | 1.397 |
| 27CN <sub>6T</sub>  | C <sub>s</sub>  | 1.435 | 1.419 | 1.435 | 1.409 | 1.400 | 1.432 | 1.400 | 1.409 |
| 28CN <sub>6T</sub>  | C <sub>2v</sub> | 1.426 | 1.426 | 1.408 | 1.409 | 1.426 | 1.426 | 1.409 | 1.408 |
| 29CN <sub>7T</sub>  | C <sub>s</sub>  | 1.438 | 1.413 | 1.436 | 1.438 | 1.411 | 1.438 | 1.401 | 1.401 |
| 30CN <sub>8T</sub>  | D <sub>2d</sub> | 1.431 | 1.421 | 1.431 | 1.421 | 1.431 | 1.421 | 1.431 | 1.421 |
|                     |                 |       |       |       |       |       |       |       |       |
| 2CN <sub>1TS</sub>  | C <sub>s</sub>  | 1.354 | 1.465 | 1.346 | 1.470 | 1.342 | 1.473 | 1.341 | 1.489 |
| 3CN <sub>2TS</sub>  | C <sub>2v</sub> | 1.367 | 1.484 | 1.343 | 1.468 | 1.341 | 1.468 | 1.343 | 1.484 |
| 4CN <sub>2TS</sub>  | C <sub>s</sub>  | 1.351 | 1.480 | 1.357 | 1.460 | 1.345 | 1.469 | 1.340 | 1.489 |
| 5CN <sub>2TS</sub>  | C <sub>2v</sub> | 1.355 | 1.458 | 1.355 | 1.484 | 1.340 | 1.472 | 1.340 | 1.484 |
| 6CN <sub>2TS</sub>  | C <sub>2h</sub> | 1.353 | 1.464 | 1.343 | 1.485 | 1.353 | 1.465 | 1.343 | 1.485 |
| 7CN <sub>3TS</sub>  | C <sub>s</sub>  | 1.368 | 1.503 | 1.357 | 1.459 | 1.343 | 1.462 | 1.342 | 1.484 |
| 8CN <sub>3TS</sub>  | C <sub>s</sub>  | 1.369 | 1.477 | 1.353 | 1.483 | 1.339 | 1.467 | 1.343 | 1.479 |
| 9CN <sub>3TS</sub>  | C <sub>s</sub>  | 1.366 | 1.483 | 1.341 | 1.482 | 1.352 | 1.461 | 1.345 | 1.480 |
| 10CN <sub>3TS</sub> | C <sub>s</sub>  | 1.350 | 1.480 | 1.354 | 1.475 | 1.356 | 1.460 | 1.342 | 1.484 |
| 11CN <sub>3TS</sub> | C <sub>s</sub>  | 1.355 | 1.454 | 1.358 | 1.477 | 1.351 | 1.487 | 1.338 | 1.483 |
| 12CN <sub>4TS</sub> | C <sub>2v</sub> | 1.371 | 1.503 | 1.371 | 1.479 | 1.341 | 1.459 | 1.341 | 1.479 |
| 13CN <sub>4TS</sub> | C <sub>s</sub>  | 1.370 | 1.499 | 1.356 | 1.459 | 1.340 | 1.477 | 1.352 | 1.478 |
| 14CN <sub>4TS</sub> | C <sub>s</sub>  | 1.367 | 1.499 | 1.359 | 1.453 | 1.353 | 1.476 | 1.340 | 1.483 |
| 15CN <sub>4TS</sub> | C <sub>s</sub>  | 1.368 | 1.476 | 1.354 | 1.500 | 1.352 | 1.459 | 1.344 | 1.474 |
| 16CN <sub>4TS</sub> | D <sub>2h</sub> | 1.365 | 1.478 | 1.343 | 1.478 | 1.365 | 1.478 | 1.343 | 1.478 |
| 17CN <sub>4TS</sub> | C <sub>s</sub>  | 1.368 | 1.473 | 1.355 | 1.476 | 1.350 | 1.481 | 1.340 | 1.478 |
| 18CN <sub>4TS</sub> | C <sub>2v</sub> | 1.371 | 1.473 | 1.353 | 1.481 | 1.337 | 1.481 | 1.353 | 1.473 |
| 19CN <sub>4TS</sub> | C <sub>4h</sub> | 1.353 | 1.476 | 1.353 | 1.476 | 1.353 | 1.476 | 1.353 | 1.476 |
| 20CN <sub>5TS</sub> | C <sub>s</sub>  | 1.370 | 1.504 | 1.374 | 1.499 | 1.354 | 1.451 | 1.341 | 1.473 |

|                     |                 |       |       |       |       |       |       |       |       |
|---------------------|-----------------|-------|-------|-------|-------|-------|-------|-------|-------|
| 21CN <sub>5TS</sub> | C <sub>S</sub>  | 1.371 | 1.498 | 1.374 | 1.473 | 1.351 | 1.473 | 1.338 | 1.478 |
| 22CN <sub>5TS</sub> | C <sub>S</sub>  | 1.366 | 1.498 | 1.357 | 1.471 | 1.366 | 1.471 | 1.342 | 1.478 |
| 23CN <sub>5TS</sub> | C <sub>S</sub>  | 1.370 | 1.499 | 1.354 | 1.474 | 1.351 | 1.469 | 1.354 | 1.473 |
| 24CN <sub>5TS</sub> | C <sub>S</sub>  | 1.370 | 1.472 | 1.354 | 1.500 | 1.350 | 1.474 | 1.354 | 1.467 |
| 25CN <sub>6TS</sub> | C <sub>2v</sub> | 1.373 | 1.506 | 1.373 | 1.492 | 1.355 | 1.445 | 1.355 | 1.492 |
| 26CN <sub>6TS</sub> | C <sub>S</sub>  | 1.373 | 1.499 | 1.373 | 1.499 | 1.352 | 1.466 | 1.352 | 1.466 |
| 27CN <sub>6TS</sub> | C <sub>2v</sub> | 1.372 | 1.492 | 1.372 | 1.472 | 1.352 | 1.491 | 1.352 | 1.472 |
| 28CN <sub>6TS</sub> | C <sub>2h</sub> | 1.368 | 1.491 | 1.355 | 1.472 | 1.368 | 1.491 | 1.355 | 1.472 |
| 29CN <sub>7TS</sub> | C <sub>S</sub>  | 1.370 | 1.491 | 1.376 | 1.500 | 1.371 | 1.490 | 1.353 | 1.463 |
| 30CN <sub>8TS</sub> | D <sub>4h</sub> | 1.374 | 1.491 | 1.374 | 1.491 | 1.374 | 1.491 | 1.374 | 1.491 |

**Table S2.** Wiberg indexes for all the compounds studied at B3LYP/6-311++G(d,p) computational level.

|                   | C1-C2 | C2-C3 | C3-C4 | C4-C5 | C5-C6 | C6-C7 | C7-C8 | C8-C1 |
|-------------------|-------|-------|-------|-------|-------|-------|-------|-------|
| COT <sub>S</sub>  | 1.07  | 1.86  | 1.07  | 1.86  | 1.07  | 1.86  | 1.07  | 1.86  |
| 2F <sub>1S</sub>  | 1.05  | 1.85  | 1.07  | 1.85  | 1.07  | 1.85  | 1.07  | 1.79  |
| 3F <sub>2S</sub>  | 1.02  | 1.80  | 1.07  | 1.85  | 1.08  | 1.85  | 1.07  | 1.80  |
| 4F <sub>2S</sub>  | 1.06  | 1.78  | 1.06  | 1.84  | 1.08  | 1.84  | 1.07  | 1.78  |
| 5F <sub>2S</sub>  | 1.05  | 1.85  | 1.05  | 1.79  | 1.07  | 1.84  | 1.07  | 1.79  |
| 6F <sub>2S</sub>  | 1.06  | 1.84  | 1.08  | 1.78  | 1.06  | 1.84  | 1.08  | 1.78  |
| 7F <sub>3S</sub>  | 1.03  | 1.71  | 1.06  | 1.83  | 1.09  | 1.83  | 1.08  | 1.79  |
| 8F <sub>3S</sub>  | 1.02  | 1.79  | 1.05  | 1.78  | 1.08  | 1.84  | 1.08  | 1.79  |
| 9F <sub>3S</sub>  | 1.02  | 1.79  | 1.07  | 1.78  | 1.06  | 1.84  | 1.07  | 1.79  |
| 10F <sub>3S</sub> | 1.06  | 1.77  | 1.06  | 1.76  | 1.06  | 1.83  | 1.08  | 1.77  |
| 11F <sub>3S</sub> | 1.06  | 1.78  | 1.05  | 1.84  | 1.06  | 1.78  | 1.07  | 1.78  |
| 12F <sub>4S</sub> | 1.03  | 1.71  | 1.03  | 1.78  | 1.09  | 1.82  | 1.09  | 1.78  |
| 13F <sub>4S</sub> | 1.03  | 1.71  | 1.06  | 1.76  | 1.07  | 1.82  | 1.09  | 1.77  |
| 14F <sub>4S</sub> | 1.03  | 1.71  | 1.06  | 1.83  | 1.07  | 1.77  | 1.08  | 1.78  |
| 15F <sub>4S</sub> | 1.02  | 1.78  | 1.06  | 1.70  | 1.07  | 1.83  | 1.08  | 1.78  |
| 16F <sub>4S</sub> | 1.03  | 1.79  | 1.07  | 1.79  | 1.03  | 1.79  | 1.07  | 1.79  |
| 17F <sub>4S</sub> | 1.03  | 1.78  | 1.06  | 1.77  | 1.06  | 1.77  | 1.08  | 1.78  |
| 18F <sub>4S</sub> | 1.02  | 1.79  | 1.06  | 1.77  | 1.08  | 1.77  | 1.06  | 1.79  |
| 19F <sub>4S</sub> | 1.07  | 1.75  | 1.07  | 1.75  | 1.07  | 1.75  | 1.07  | 1.75  |
| 20F <sub>5S</sub> | 1.04  | 1.70  | 1.04  | 1.69  | 1.07  | 1.81  | 1.10  | 1.76  |
| 21F <sub>5S</sub> | 1.03  | 1.71  | 1.03  | 1.77  | 1.07  | 1.75  | 1.09  | 1.77  |

|                   |      |      |      |      |      |      |      |      |
|-------------------|------|------|------|------|------|------|------|------|
| 22F <sub>5S</sub> | 1.04 | 1.70 | 1.06 | 1.77 | 1.03 | 1.77 | 1.09 | 1.77 |
| 23F <sub>5S</sub> | 1.04 | 1.69 | 1.07 | 1.75 | 1.08 | 1.75 | 1.07 | 1.76 |
| 24F <sub>5S</sub> | 1.02 | 1.78 | 1.06 | 1.70 | 1.07 | 1.76 | 1.06 | 1.77 |
| 25F <sub>6S</sub> | 1.04 | 1.70 | 1.04 | 1.70 | 1.04 | 1.75 | 1.10 | 1.75 |
| 26F <sub>6S</sub> | 1.04 | 1.70 | 1.04 | 1.69 | 1.08 | 1.74 | 1.08 | 1.76 |
| 27F <sub>6S</sub> | 1.03 | 1.70 | 1.03 | 1.76 | 1.08 | 1.68 | 1.08 | 1.76 |
| 28F <sub>6S</sub> | 1.04 | 1.69 | 1.07 | 1.76 | 1.04 | 1.69 | 1.07 | 1.76 |
| 29F <sub>7S</sub> | 1.04 | 1.69 | 1.04 | 1.69 | 1.05 | 1.67 | 1.08 | 1.75 |
| 30F <sub>8S</sub> | 1.05 | 1.68 | 1.05 | 1.68 | 1.05 | 1.68 | 1.05 | 1.68 |
| COT <sub>T</sub>  | 1.36 | 1.36 | 1.36 | 1.36 | 1.36 | 1.36 | 1.36 | 1.36 |
| 2F <sub>1T</sub>  | 1.33 | 1.38 | 1.35 | 1.37 | 1.37 | 1.35 | 1.38 | 1.33 |
| 3F <sub>2T</sub>  | 1.26 | 1.34 | 1.37 | 1.36 | 1.37 | 1.36 | 1.37 | 1.34 |
| 4F <sub>2T</sub>  | 1.34 | 1.34 | 1.32 | 1.38 | 1.35 | 1.35 | 1.38 | 1.32 |
| 5F <sub>2T</sub>  | 1.31 | 1.40 | 1.31 | 1.33 | 1.39 | 1.34 | 1.39 | 1.33 |
| 6F <sub>2T</sub>  | 1.33 | 1.37 | 1.37 | 1.33 | 1.33 | 1.37 | 1.37 | 1.33 |
| 7F <sub>3T</sub>  | 1.28 | 1.28 | 1.34 | 1.37 | 1.36 | 1.36 | 1.37 | 1.34 |
| 8F <sub>3T</sub>  | 1.26 | 1.36 | 1.34 | 1.32 | 1.39 | 1.34 | 1.38 | 1.34 |
| 9F <sub>3T</sub>  | 1.27 | 1.33 | 1.39 | 1.32 | 1.33 | 1.38 | 1.36 | 1.35 |
| 10F <sub>3T</sub> | 1.35 | 1.33 | 1.33 | 1.35 | 1.32 | 1.37 | 1.37 | 1.32 |
| 11F <sub>3T</sub> | 1.35 | 1.35 | 1.31 | 1.40 | 1.32 | 1.32 | 1.40 | 1.31 |
| 12F <sub>4T</sub> | 1.28 | 1.30 | 1.28 | 1.34 | 1.38 | 1.35 | 1.38 | 1.34 |
| 13F <sub>4T</sub> | 1.28 | 1.27 | 1.36 | 1.33 | 1.33 | 1.38 | 1.36 | 1.35 |
| 14F <sub>4T</sub> | 1.28 | 1.28 | 1.33 | 1.39 | 1.32 | 1.32 | 1.39 | 1.33 |
| 15F <sub>4T</sub> | 1.26 | 1.35 | 1.35 | 1.26 | 1.35 | 1.37 | 1.37 | 1.35 |
| 16F <sub>4T</sub> | 1.27 | 1.34 | 1.38 | 1.34 | 1.27 | 1.34 | 1.38 | 1.34 |
| 17F <sub>4T</sub> | 1.26 | 1.37 | 1.32 | 1.34 | 1.35 | 1.31 | 1.39 | 1.33 |
| 18F <sub>4T</sub> | 1.25 | 1.36 | 1.34 | 1.31 | 1.40 | 1.31 | 1.34 | 1.37 |
| 19F <sub>4T</sub> | 1.34 | 1.34 | 1.34 | 1.34 | 1.34 | 1.34 | 1.34 | 1.34 |
| 20F <sub>5T</sub> | 1.28 | 1.29 | 1.29 | 1.28 | 1.35 | 1.37 | 1.37 | 1.35 |
| 21F <sub>5T</sub> | 1.28 | 1.30 | 1.27 | 1.36 | 1.34 | 1.32 | 1.40 | 1.33 |
| 22F <sub>5T</sub> | 1.29 | 1.28 | 1.35 | 1.36 | 1.26 | 1.34 | 1.38 | 1.33 |
| 23F <sub>5T</sub> | 1.27 | 1.27 | 1.36 | 1.32 | 1.34 | 1.34 | 1.33 | 1.36 |
| 24F <sub>5T</sub> | 1.25 | 1.35 | 1.35 | 1.25 | 1.37 | 1.33 | 1.33 | 1.37 |
| 25F <sub>6T</sub> | 1.28 | 1.29 | 1.28 | 1.30 | 1.28 | 1.34 | 1.38 | 1.34 |
| 26F <sub>6T</sub> | 1.27 | 1.29 | 1.29 | 1.27 | 1.36 | 1.33 | 1.33 | 1.36 |



|                   |      |      |      |      |      |      |      |      |
|-------------------|------|------|------|------|------|------|------|------|
| 27F <sub>6T</sub> | 1.27 | 1.31 | 1.27 | 1.34 | 1.36 | 1.26 | 1.36 | 1.35 |
| 28F <sub>6T</sub> | 1.28 | 1.28 | 1.35 | 1.35 | 1.28 | 1.28 | 1.35 | 1.35 |
| 29F <sub>7T</sub> | 1.27 | 1.30 | 1.28 | 1.28 | 1.30 | 1.27 | 1.35 | 1.35 |
| 30F <sub>8T</sub> | 1.29 | 1.29 | 1.29 | 1.29 | 1.29 | 1.29 | 1.29 | 1.29 |

COT<sub>TS</sub>

|                    |      |      |      |      |      |      |      |      |
|--------------------|------|------|------|------|------|------|------|------|
| 2F <sub>1TS</sub>  | 1.82 | 1.07 | 1.82 | 1.07 | 1.82 | 1.07 | 1.82 | 1.07 |
| 3F <sub>2TS</sub>  | 1.68 | 1.07 | 1.82 | 1.08 | 1.82 | 1.08 | 1.82 | 1.07 |
| 4F <sub>2TS</sub>  | 1.07 | 1.75 | 1.06 | 1.81 | 1.09 | 1.79 | 1.09 | 1.74 |
| 5F <sub>2TS</sub>  | 1.75 | 1.08 | 1.76 | 1.06 | 1.83 | 1.07 | 1.83 | 1.06 |
| 6F <sub>2TS</sub>  | 1.74 | 1.09 | 1.80 | 1.06 | 1.74 | 1.09 | 1.80 | 1.06 |
| 7F <sub>3TS</sub>  | 1.68 | 1.03 | 1.76 | 1.09 | 1.80 | 1.08 | 1.82 | 1.07 |
| 8F <sub>3TS</sub>  | 1.67 | 1.07 | 1.76 | 1.06 | 1.82 | 1.08 | 1.81 | 1.07 |
| 9F <sub>3TS</sub>  | 1.68 | 1.07 | 1.82 | 1.06 | 1.75 | 1.09 | 1.81 | 1.07 |
| 10F <sub>3TS</sub> | 1.73 | 1.08 | 1.72 | 1.08 | 1.71 | 1.10 | 1.78 | 1.07 |
| 11F <sub>3TS</sub> | 1.76 | 1.06 | 1.74 | 1.09 | 1.75 | 1.06 | 1.83 | 1.06 |
| 12F <sub>4TS</sub> | 1.68 | 1.03 | 1.68 | 1.07 | 1.81 | 1.08 | 1.81 | 1.07 |
| 13F <sub>4TS</sub> | 1.67 | 1.04 | 1.74 | 1.07 | 1.74 | 1.09 | 1.80 | 1.07 |
| 14F <sub>4TS</sub> | 1.68 | 1.03 | 1.75 | 1.09 | 1.75 | 1.06 | 1.82 | 1.07 |
| 15F <sub>4TS</sub> | 1.67 | 1.08 | 1.76 | 1.02 | 1.77 | 1.08 | 1.81 | 1.07 |
| 16F <sub>4TS</sub> | 1.68 | 1.07 | 1.81 | 1.07 | 1.68 | 1.07 | 1.81 | 1.07 |
| 17F <sub>4TS</sub> | 1.66 | 1.08 | 1.73 | 1.07 | 1.75 | 1.06 | 1.81 | 1.08 |
| 18F <sub>4TS</sub> | 1.67 | 1.07 | 1.76 | 1.06 | 1.83 | 1.06 | 1.76 | 1.08 |
| 19F <sub>4TS</sub> | 1.70 | 1.09 | 1.70 | 1.09 | 1.70 | 1.09 | 1.70 | 1.09 |
| 20F <sub>5TS</sub> | 1.68 | 1.03 | 1.67 | 1.03 | 1.75 | 1.09 | 1.80 | 1.07 |
| 21F <sub>5TS</sub> | 1.67 | 1.04 | 1.67 | 1.08 | 1.75 | 1.06 | 1.82 | 1.08 |
| 22F <sub>5TS</sub> | 1.03 | 1.67 | 1.08 | 1.76 | 1.02 | 1.76 | 1.09 | 1.75 |
| 23F <sub>5TS</sub> | 1.64 | 1.04 | 1.73 | 1.08 | 1.72 | 1.08 | 1.72 | 1.09 |
| 24F <sub>5TS</sub> | 1.66 | 1.08 | 1.76 | 1.02 | 1.76 | 1.07 | 1.74 | 1.08 |
| 25F <sub>6TS</sub> | 1.03 | 1.68 | 1.03 | 1.67 | 1.03 | 1.75 | 1.09 | 1.75 |
| 26F <sub>6TS</sub> | 1.66 | 1.05 | 1.67 | 1.04 | 1.74 | 1.07 | 1.73 | 1.08 |
| 27F <sub>6TS</sub> | 1.67 | 1.04 | 1.67 | 1.08 | 1.76 | 1.02 | 1.76 | 1.08 |
| 28F <sub>6TS</sub> | 1.04 | 1.66 | 1.08 | 1.74 | 1.04 | 1.66 | 1.08 | 1.74 |
| 29F <sub>7TS</sub> | 1.67 | 1.04 | 1.66 | 1.04 | 1.68 | 1.04 | 1.75 | 1.08 |
| 30F <sub>8TS</sub> | 1.04 | 1.66 | 1.04 | 1.67 | 1.04 | 1.67 | 1.04 | 1.67 |

|                    |       |       |       |       |       |       |       |       |
|--------------------|-------|-------|-------|-------|-------|-------|-------|-------|
| 2CN <sub>1S</sub>  | 1.02  | 1.87  | 1.07  | 1.85  | 1.07  | 1.84  | 1.08  | 1.74  |
| 3CN <sub>2S</sub>  | 0.98  | 1.75  | 1.08  | 1.84  | 1.08  | 1.84  | 1.08  | 1.75  |
| 4CN <sub>2S</sub>  | 1.03  | 1.76  | 1.02  | 1.87  | 1.07  | 1.84  | 1.09  | 1.72  |
| 5CN <sub>2S</sub>  | 1.02  | 1.88  | 1.02  | 1.74  | 1.08  | 1.83  | 1.08  | 1.74  |
| 6CN <sub>2S</sub>  | 1.02  | 1.86  | 1.08  | 1.74  | 1.02  | 1.86  | 1.08  | 1.74  |
| 7CN <sub>3S</sub>  | 0.98  | 1.66  | 1.03  | 1.85  | 1.08  | 1.83  | 1.09  | 1.74  |
| 8CN <sub>3S</sub>  | 0.98  | 1.77  | 1.03  | 1.72  | 1.09  | 1.82  | 1.08  | 1.75  |
| 9CN <sub>3S</sub>  | 0.98  | 1.75  | 1.09  | 1.73  | 1.03  | 1.85  | 1.08  | 1.75  |
| 10CN <sub>3S</sub> | 1.03  | 1.75  | 1.03  | 1.76  | 1.02  | 1.85  | 1.08  | 1.73  |
| 11CN <sub>3S</sub> | 1.03  | 1.76  | 1.02  | 1.88  | 1.02  | 1.73  | 1.09  | 1.72  |
| 12CN <sub>4S</sub> | 0.98  | 1.67  | 0.98  | 1.74  | 1.09  | 1.82  | 1.09  | 1.74  |
| 13CN <sub>4S</sub> | 0.98  | 1.65  | 1.04  | 1.75  | 1.03  | 1.85  | 1.08  | 1.74  |
| 14CN <sub>4S</sub> | 0.98  | 1.66  | 1.03  | 1.86  | 1.03  | 1.72  | 1.09  | 1.74  |
| 15CN <sub>4S</sub> | 0.98  | 1.77  | 1.04  | 1.63  | 1.04  | 1.84  | 1.08  | 1.75  |
| 16CN <sub>4S</sub> | 0.98  | 1.75  | 1.08  | 1.75  | 0.98  | 1.75  | 1.08  | 1.75  |
| 17CN <sub>4S</sub> | 0.98  | 1.77  | 1.03  | 1.74  | 1.04  | 1.72  | 1.09  | 1.74  |
| 18CN <sub>4S</sub> | 0.98  | 1.77  | 1.03  | 1.72  | 1.10  | 1.72  | 1.03  | 1.77  |
| 19CN <sub>4S</sub> | 1.03  | 1.75  | 1.03  | 1.75  | 1.03  | 1.75  | 1.03  | 1.75  |
| 20CN <sub>5S</sub> | 0.99  | 1.67  | 0.98  | 1.65  | 1.04  | 1.83  | 1.09  | 1.73  |
| 21CN <sub>5S</sub> | 0.99  | 1.67  | 0.98  | 1.76  | 1.04  | 1.71  | 1.10  | 1.73  |
| 22CN <sub>5S</sub> | 0.99  | 1.65  | 1.03  | 1.76  | 0.99  | 1.74  | 1.09  | 1.74  |
| 23CN <sub>5S</sub> | 0.98  | 1.65  | 1.04  | 1.74  | 1.04  | 1.74  | 1.03  | 1.76  |
| 24CN <sub>5S</sub> | 0.98  | 1.76  | 1.04  | 1.63  | 1.05  | 1.74  | 1.03  | 1.77  |
| 25CN <sub>6S</sub> | 0.99  | 1.66  | 0.98  | 1.66  | 0.99  | 1.73  | 1.10  | 1.73  |
| 26CN <sub>6S</sub> | 0.99  | 1.67  | 0.99  | 1.64  | 1.05  | 1.73  | 1.04  | 1.75  |
| 27CN <sub>6S</sub> | 0.99  | 1.67  | 0.99  | 1.75  | 1.05  | 1.62  | 1.05  | 1.75  |
| 28CN <sub>6S</sub> | 0.99  | 1.65  | 1.04  | 1.76  | 0.99  | 1.65  | 1.04  | 1.76  |
| 29CN <sub>7S</sub> | 0.99  | 1.66  | 0.99  | 1.66  | 0.99  | 1.64  | 1.04  | 1.75  |
| 30CN <sub>8S</sub> | 0.994 | 1.651 | 0.993 | 1.655 | 0.994 | 1.654 | 0.994 | 1.652 |
| 2CN <sub>1T</sub>  | 1.27  | 1.40  | 1.34  | 1.37  | 1.37  | 1.34  | 1.40  | 1.27  |
| 3CN <sub>2T</sub>  | 1.21  | 1.31  | 1.39  | 1.35  | 1.38  | 1.35  | 1.39  | 1.31  |
| 4CN <sub>2T</sub>  | 1.32  | 1.32  | 1.26  | 1.41  | 1.35  | 1.35  | 1.41  | 1.26  |
| 5CN <sub>2T</sub>  | 1.26  | 1.44  | 1.26  | 1.28  | 1.42  | 1.32  | 1.42  | 1.28  |
| 6CN <sub>2T</sub>  | 1.29  | 1.38  | 1.38  | 1.29  | 1.29  | 1.38  | 1.38  | 1.29  |
| 7CN <sub>3T</sub>  | 1.24  | 1.24  | 1.30  | 1.39  | 1.36  | 1.36  | 1.39  | 1.30  |

|                     |       |       |       |       |       |       |       |       |
|---------------------|-------|-------|-------|-------|-------|-------|-------|-------|
| 8CN <sub>3T</sub>   | 1.20  | 1.35  | 1.30  | 1.27  | 1.42  | 1.33  | 1.40  | 1.31  |
| 9CN <sub>3T</sub>   | 1.22  | 1.29  | 1.43  | 1.27  | 1.30  | 1.39  | 1.36  | 1.32  |
| 10CN <sub>3T</sub>  | 1.32  | 1.30  | 1.30  | 1.32  | 1.27  | 1.39  | 1.39  | 1.27  |
| 11CN <sub>3T</sub>  | 1.33  | 1.33  | 1.24  | 1.45  | 1.27  | 1.27  | 1.45  | 1.24  |
| 12CN <sub>4T</sub>  | 1.23  | 1.27  | 1.23  | 1.30  | 1.40  | 1.34  | 1.40  | 1.30  |
| 13CN <sub>4T</sub>  | 1.24  | 1.23  | 1.34  | 1.31  | 1.28  | 1.40  | 1.37  | 1.31  |
| 14CN <sub>4T</sub>  | 1.25  | 1.25  | 1.28  | 1.43  | 1.28  | 1.28  | 1.43  | 1.27  |
| 15CN <sub>4T</sub>  | 1.21  | 1.31  | 1.34  | 1.20  | 1.33  | 1.37  | 1.37  | 1.33  |
| 16CN <sub>4T</sub>  | 1.22  | 1.30  | 1.39  | 1.30  | 1.23  | 1.30  | 1.40  | 1.30  |
| 17CN <sub>4T</sub>  | 1.21  | 1.36  | 1.28  | 1.31  | 1.34  | 1.25  | 1.43  | 1.29  |
| 18CN <sub>4T</sub>  | 1.18  | 1.36  | 1.31  | 1.25  | 1.46  | 1.25  | 1.31  | 1.36  |
| 19CN <sub>4T</sub>  | 1.31  | 1.31  | 1.31  | 1.31  | 1.31  | 1.31  | 1.31  | 1.31  |
| 20CN <sub>5T</sub>  | 1.22  | 1.26  | 1.26  | 1.22  | 1.32  | 1.38  | 1.38  | 1.32  |
| 21CN <sub>5T</sub>  | 1.24  | 1.28  | 1.21  | 1.34  | 1.32  | 1.26  | 1.44  | 1.28  |
| 22CN <sub>5T</sub>  | 1.26  | 1.21  | 1.29  | 1.35  | 1.21  | 1.31  | 1.41  | 1.29  |
| 23CN <sub>5T</sub>  | 1.23  | 1.23  | 1.35  | 1.29  | 1.32  | 1.32  | 1.29  | 1.35  |
| 24CN <sub>5T</sub>  | 1.19  | 1.34  | 1.34  | 1.19  | 1.37  | 1.29  | 1.29  | 1.37  |
| 25CN <sub>6T</sub>  | 1.25  | 1.24  | 1.26  | 1.24  | 1.25  | 1.30  | 1.41  | 1.30  |
| 26CN <sub>6T</sub>  | 1.19  | 1.27  | 1.27  | 1.19  | 1.38  | 1.29  | 1.29  | 1.38  |
| 27CN <sub>6T</sub>  | 1.22  | 1.30  | 1.22  | 1.32  | 1.35  | 1.19  | 1.36  | 1.30  |
| 28CN <sub>6T</sub>  | 1.24  | 1.24  | 1.33  | 1.30  | 1.22  | 1.22  | 1.33  | 1.33  |
| 29CN <sub>7T</sub>  | 1.19  | 1.32  | 1.22  | 1.21  | 1.33  | 1.19  | 1.35  | 1.35  |
| 30CN <sub>8T</sub>  | 1.23  | 1.29  | 1.23  | 1.29  | 1.23  | 1.28  | 1.23  | 1.29  |
| 2CN <sub>1TS</sub>  | 1.695 | 1.096 | 1.789 | 1.083 | 1.815 | 1.074 | 1.837 | 1.028 |
| 3CN <sub>2TS</sub>  | 1.60  | 1.05  | 1.81  | 1.08  | 1.81  | 1.08  | 1.81  | 1.05  |
| 4CN <sub>2TS</sub>  | 1.72  | 1.05  | 1.67  | 1.11  | 1.78  | 1.08  | 1.83  | 1.03  |
| 5CN <sub>2TS</sub>  | 1.68  | 1.11  | 1.68  | 1.04  | 1.83  | 1.07  | 1.83  | 1.04  |
| 6CN <sub>2TS</sub>  | 1.69  | 1.09  | 1.81  | 1.04  | 1.69  | 1.10  | 1.81  | 1.04  |
| 7CN <sub>3TS</sub>  | 1.01  | 1.61  | 1.05  | 1.80  | 1.09  | 1.78  | 1.11  | 1.68  |
| 8CN <sub>3TS</sub>  | 1.58  | 1.06  | 1.70  | 1.04  | 1.82  | 1.08  | 1.80  | 1.06  |
| 9CN <sub>3TS</sub>  | 1.59  | 1.05  | 1.82  | 1.04  | 1.69  | 1.10  | 1.79  | 1.05  |
| 10CN <sub>3TS</sub> | 1.71  | 1.05  | 1.69  | 1.06  | 1.67  | 1.11  | 1.80  | 1.04  |
| 11CN <sub>3TS</sub> | 1.05  | 1.71  | 1.03  | 1.84  | 1.04  | 1.67  | 1.13  | 1.65  |
| 12CN <sub>4TS</sub> | 1.59  | 1.02  | 1.59  | 1.06  | 1.79  | 1.10  | 1.79  | 1.06  |
| 13CN <sub>4TS</sub> | 1.02  | 1.59  | 1.07  | 1.69  | 1.05  | 1.79  | 1.11  | 1.68  |

|                     |      |      |      |      |      |      |      |      |
|---------------------|------|------|------|------|------|------|------|------|
| 14CN <sub>4TS</sub> | 1.61 | 1.01 | 1.67 | 1.13 | 1.67 | 1.05 | 1.82 | 1.05 |
| 15CN <sub>4TS</sub> | 1.57 | 1.07 | 1.70 | 1.01 | 1.70 | 1.10 | 1.78 | 1.06 |
| 16CN <sub>4TS</sub> | 1.59 | 1.05 | 1.80 | 1.06 | 1.59 | 1.05 | 1.80 | 1.05 |
| 17CN <sub>4TS</sub> | 1.57 | 1.07 | 1.68 | 1.06 | 1.71 | 1.04 | 1.82 | 1.06 |
| 18CN <sub>4TS</sub> | 1.56 | 1.08 | 1.69 | 1.04 | 1.83 | 1.04 | 1.69 | 1.07 |
| 19CN <sub>4TS</sub> | 1.69 | 1.06 | 1.69 | 1.06 | 1.69 | 1.06 | 1.69 | 1.06 |
| 20CN <sub>5TS</sub> | 1.59 | 1.03 | 1.60 | 1.03 | 1.67 | 1.11 | 1.77 | 1.06 |
| 21CN <sub>5TS</sub> | 1.59 | 1.03 | 1.58 | 1.08 | 1.68 | 1.05 | 1.81 | 1.06 |
| 22CN <sub>5TS</sub> | 1.60 | 1.00 | 1.69 | 1.07 | 1.57 | 1.06 | 1.79 | 1.05 |
| 23CN <sub>5TS</sub> | 1.59 | 1.02 | 1.70 | 1.06 | 1.69 | 1.06 | 1.67 | 1.07 |
| 24CN <sub>5TS</sub> | 1.56 | 1.07 | 1.70 | 1.00 | 1.72 | 1.06 | 1.67 | 1.08 |
| 25CN <sub>6TS</sub> | 1.03 | 1.60 | 1.03 | 1.60 | 1.02 | 1.65 | 1.14 | 1.65 |
| 26CN <sub>6TS</sub> | 1.57 | 1.03 | 1.60 | 1.03 | 1.69 | 1.07 | 1.66 | 1.09 |
| 27CN <sub>6TS</sub> | 1.57 | 1.04 | 1.57 | 1.06 | 1.70 | 1.01 | 1.70 | 1.08 |
| 28CN <sub>6TS</sub> | 1.55 | 1.03 | 1.68 | 1.08 | 1.58 | 1.02 | 1.69 | 1.08 |
| 29CN <sub>7TS</sub> | 1.57 | 1.04 | 1.59 | 1.04 | 1.60 | 1.02 | 1.68 | 1.07 |
| 30CN <sub>8TS</sub> | 1.05 | 1.58 | 1.04 | 1.57 | 1.05 | 1.58 | 1.04 | 1.57 |

**Table S3.** NICS values (ppm) and HOMA indexes for all the compounds studied at B3LYP/6-311++G(d,p) computational level.

| Comp.             | NICS |      |      |      |      | HOMA  | Comp.              | NICS |      |     |      |      | HOMA  |
|-------------------|------|------|------|------|------|-------|--------------------|------|------|-----|------|------|-------|
|                   | -2   | -1   | 0    | 1    | 2    |       |                    | -2   | -1   | 0   | 1    | 2    |       |
| COT <sub>S</sub>  | 0.7  | 1.0  | 4.8  | 1.0  | 0.7  | -0.24 |                    |      |      |     |      |      |       |
| 2F <sub>1S</sub>  | 0.5  | 0.5  | 3.9  | 0.9  | 0.7  | -0.17 | 2CN <sub>1S</sub>  | 0.3  | 0.3  | 3.9 | 0.5  | 0.4  | -0.22 |
| 3F <sub>2S</sub>  | 0.1  | -0.5 | 1.8  | -0.5 | 0.1  | -0.20 | 3CN <sub>2S</sub>  | -0.1 | -0.8 | 2.5 | -0.8 | -0.1 | -0.25 |
| 4F <sub>2S</sub>  | 0.4  | 0.1  | 2.5  | 0.1  | 0.4  | -0.11 | 4CN <sub>2S</sub>  | 0.1  | -0.4 | 3.0 | -0.4 | 0.1  | -0.24 |
| 5F <sub>2S</sub>  | 0.2  | -0.1 | 2.7  | 0.6  | 0.7  | -0.16 | 5CN <sub>2S</sub>  | 0.1  | -0.4 | 3.2 | 0.1  | 0.2  | -0.24 |
| 6F <sub>2S</sub>  | 0.3  | 0.1  | 2.9  | 0.8  | 0.8  | -0.11 | 6CN <sub>2S</sub>  | -0.2 | -0.6 | 3.0 | -0.1 | 0.1  | -0.24 |
| 7F <sub>3S</sub>  | -0.2 | -1.2 | 0.1  | -1.8 | -0.4 | -0.08 | 7CN <sub>3S</sub>  | -0.4 | -1.4 | 1.5 | -1.8 | -0.5 | -0.28 |
| 8F <sub>3S</sub>  | -0.2 | -1.3 | 0.5  | -0.9 | 0.0  | -0.16 | 8CN <sub>3S</sub>  | -0.3 | -1.3 | 1.9 | -1.2 | -0.3 | -0.27 |
| 9F <sub>3S</sub>  | 0.0  | -0.8 | 1.2  | -0.4 | 0.2  | -0.16 | 9CN <sub>3S</sub>  | -0.4 | -1.4 | 1.8 | -1.2 | -0.3 | -0.28 |
| 10F <sub>3S</sub> | 0.1  | -0.5 | 1.4  | -0.2 | 0.4  | -0.04 | 10CN <sub>3S</sub> | -0.3 | -1.1 | 2.2 | -0.9 | -0.1 | -0.26 |
| 11F <sub>3S</sub> | 0.4  | -0.1 | 1.6  | -0.4 | 0.2  | -0.12 | 11CN <sub>3S</sub> | -0.1 | -0.7 | 2.3 | -0.9 | -0.2 | -0.26 |
| 12F <sub>4S</sub> | -0.7 | -2.4 | -1.8 | -2.7 | -0.7 | -0.09 | 12CN <sub>4S</sub> | -0.7 | -2.1 | 0.7 | -2.4 | -0.7 | -0.32 |
| 13F <sub>4S</sub> | -0.4 | -1.9 | -1.0 | -2.0 | -0.4 | -0.03 | 13CN <sub>4S</sub> | -0.6 | -2.0 | 0.8 | -2.1 | -0.7 | -0.32 |

|                   |      |       |       |       |      |       |                    |      |       |       |       |      |       |
|-------------------|------|-------|-------|-------|------|-------|--------------------|------|-------|-------|-------|------|-------|
| 14F <sub>4S</sub> | -0.1 | -1.2  | -0.7  | -2.1  | -0.5 | -0.07 | 14CN <sub>4S</sub> | -0.5 | -1.7  | 0.9   | -2.2  | -0.7 | -0.32 |
| 15F <sub>4S</sub> | -0.5 | -2.1  | -0.9  | -1.4  | -0.1 | -0.08 | 15CN <sub>4S</sub> | -0.7 | -2.1  | 1.0   | -1.7  | -0.5 | -0.32 |
| 16F <sub>4S</sub> | -0.1 | -1.4  | -0.3  | -1.4  | -0.1 | -0.19 | 16CN <sub>4S</sub> | -0.7 | -2.2  | 0.6   | -2.2  | -0.7 | -0.34 |
| 17F <sub>4S</sub> | -0.1 | -1.4  | -0.4  | -1.4  | -0.1 | -0.10 | 17CN <sub>4S</sub> | -0.5 | -1.7  | 1.1   | -1.7  | -0.5 | -0.31 |
| 18F <sub>4S</sub> | -0.2 | -1.5  | -0.6  | -1.5  | -0.2 | -0.14 | 18CN <sub>4S</sub> | -0.5 | -1.7  | 1.2   | -1.7  | -0.5 | -0.30 |
| 19F <sub>4S</sub> | 0.0  | -1.1  | 0.0   | -1.1  | 0.0  | 0.05  | 19CN <sub>4S</sub> | -0.5 | -1.6  | 1.3   | -1.6  | -0.5 | -0.29 |
| 20F <sub>5S</sub> | -1.1 | -3.5  | -3.4  | -3.3  | -0.9 | 0.01  | 20CN <sub>5S</sub> | -1.1 | -2.9  | -0.1  | -2.8  | -0.9 | -0.37 |
| 21F <sub>5S</sub> | -0.6 | -2.5  | -2.7  | -3.1  | -0.8 | -0.06 | 21CN <sub>5S</sub> | -0.8 | -2.3  | 0.2   | -2.7  | -0.8 | -0.36 |
| 22F <sub>5S</sub> | -0.4 | -2.3  | -2.2  | -2.7  | -0.7 | -0.08 | 22CN <sub>5S</sub> | -0.8 | -2.5  | 0.0   | -2.7  | -0.9 | -0.38 |
| 23F <sub>5S</sub> | -0.5 | -2.2  | -2.3  | -2.7  | -0.7 | 0.03  | 23CN <sub>5S</sub> | -0.7 | -2.3  | 0.2   | -2.6  | -0.8 | -0.35 |
| 24F <sub>5S</sub> | -0.6 | -2.6  | -2.1  | -2.2  | -0.4 | -0.06 | 24CN <sub>5S</sub> | -0.7 | -2.4  | 0.3   | -2.2  | -0.7 | -0.34 |
| 25F <sub>6S</sub> | -1.1 | -3.9  | -4.6  | -3.9  | -1.1 | -0.01 | 25CN <sub>6S</sub> | -1.3 | -3.6  | -1.2  | -3.6  | -1.3 | -0.43 |
| 26F <sub>6S</sub> | -1.0 | -3.6  | -4.3  | -3.7  | -1.0 | 0.04  | 26CN <sub>6S</sub> | -1.1 | -3.1  | -0.6  | -3.2  | -1.0 | -0.41 |
| 27F <sub>6S</sub> | -0.7 | -3.0  | -4.1  | -3.9  | -1.1 | -0.01 | 27CN <sub>6S</sub> | -1.0 | -2.9  | -0.7  | -3.4  | -1.2 | -0.41 |
| 28F <sub>6S</sub> | -0.6 | -2.9  | -3.9  | -3.7  | -1.1 | 0.02  | 28CN <sub>6S</sub> | -1.0 | -3.0  | -0.7  | -3.4  | -1.1 | -0.42 |
| 29F <sub>7S</sub> | -1.2 | -4.3  | -5.8  | -4.6  | -1.4 | 0.06  | 29CN <sub>7S</sub> | -1.2 | -3.6  | -1.3  | -3.8  | -1.2 | -0.49 |
| 30F <sub>8S</sub> | -1.5 | -5.1  | -7.2  | -5.1  | -1.5 | 0.08  | 30CN <sub>8S</sub> | -1.8 | -4.7  | -2.9  | -4.7  | -1.8 | -0.56 |
| Comp.             | -2   | -1    | 0     | 1     | 2    | HOMA  | Comp.              | -2   | -1    | 0     | 1     | 2    | HOMA  |
| COT <sub>T</sub>  | -6.4 | -11.0 | -11.1 | -11.0 | -6.4 | 0.94  |                    |      |       |       |       |      |       |
| 2F <sub>1T</sub>  | -6.1 | -10.8 | -11.3 | -10.8 | -6.1 | 0.96  | 2CN <sub>1T</sub>  | -6.1 | -10.5 | -10.7 | -10.5 | -6.1 | 0.91  |
| 3F <sub>2T</sub>  | -6.1 | -11.0 | -11.9 | -11.0 | -6.1 | 0.96  | 3CN <sub>2T</sub>  | -5.8 | -10.1 | -10.2 | -10.1 | -5.8 | 0.87  |
| 4F <sub>2T</sub>  | -5.9 | -10.6 | -11.5 | -10.6 | -5.9 | 0.97  | 4CN <sub>2T</sub>  | -5.9 | -10.1 | -10.3 | -10.1 | -5.9 | 0.89  |
| 5F <sub>2T</sub>  | -6.0 | -10.7 | -11.6 | -10.7 | -6.0 | 0.97  | 5CN <sub>2T</sub>  | -5.7 | -9.8  | -9.9  | -9.8  | -5.7 | 0.87  |
| 6F <sub>2T</sub>  | -5.9 | -10.7 | -11.6 | -10.7 | -5.9 | 0.98  | 6CN <sub>2T</sub>  | -6.1 | -10.4 | -10.7 | -10.4 | -6.1 | 0.90  |
| 7F <sub>3T</sub>  | -6.1 | -11.1 | -12.5 | -11.1 | -6.1 | 0.96  | 7CN <sub>3T</sub>  | -5.9 | -10.1 | -10.4 | -10.1 | -5.9 | 0.82  |
| 8F <sub>3T</sub>  | -5.9 | -10.8 | -12.2 | -10.8 | -5.9 | 0.97  | 8CN <sub>3T</sub>  | -5.6 | -9.6  | -9.8  | -9.6  | -5.6 | 0.84  |
| 9F <sub>3T</sub>  | -6.0 | -11.0 | -12.4 | -11.0 | -6.0 | 0.97  | 9CN <sub>3T</sub>  | -5.6 | -9.7  | -9.9  | -9.7  | -5.6 | 0.85  |
| 10F <sub>3T</sub> | -5.7 | -10.6 | -11.9 | -10.6 | -5.7 | 0.98  | 10CN <sub>3T</sub> | -6.0 | -10.2 | -10.6 | -10.2 | -6.0 | 0.88  |
| 11F <sub>3T</sub> | -5.6 | -10.3 | -11.5 | -10.3 | -5.6 | 0.98  | 11CN <sub>3T</sub> | -5.7 | -9.6  | -9.9  | -9.6  | -5.7 | 0.84  |
| 12F <sub>4T</sub> | -6.1 | -11.4 | -13.1 | -11.4 | -6.1 | 0.96  | 12CN <sub>4T</sub> | -5.4 | -9.4  | -9.7  | -9.4  | -5.4 | 0.76  |
| 13F <sub>4T</sub> | -6.0 | -11.2 | -13.1 | -11.2 | -6.0 | 0.97  | 13CN <sub>4T</sub> | -5.4 | -9.4  | -9.7  | -9.4  | -5.4 | 0.81  |
| 14F <sub>4T</sub> | -5.8 | -11.0 | -12.7 | -11.0 | -5.8 | 0.97  | 14CN <sub>4T</sub> | -5.7 | -9.7  | -10.1 | -9.7  | -5.7 | 0.80  |
| 15F <sub>4T</sub> | -5.8 | -11.0 | -12.7 | -11.0 | -5.8 | 0.97  | 15CN <sub>4T</sub> | -5.7 | -9.6  | -10.0 | -9.6  | -5.7 | 0.81  |
| 16F <sub>4T</sub> | -6.0 | -11.2 | -13.1 | -11.2 | -6.0 | 0.97  | 16CN <sub>4T</sub> | -5.5 | -9.4  | -9.8  | -9.4  | -5.5 | 0.83  |
| 17F <sub>4T</sub> | -5.8 | -10.9 | -12.7 | -10.9 | -5.8 | 0.98  | 17CN <sub>4T</sub> | -5.4 | -9.3  | -9.6  | -9.3  | -5.4 | 0.83  |

|                   |      |       |       |       |      |      |                    |      |       |       |       |      |      |
|-------------------|------|-------|-------|-------|------|------|--------------------|------|-------|-------|-------|------|------|
| 18F <sub>4T</sub> | -5.7 | -10.7 | -12.4 | -10.7 | -5.7 | 0.97 | 18CN <sub>4T</sub> | -5.3 | -9.0  | -9.3  | -9.0  | -5.3 | 0.80 |
| 19F <sub>4T</sub> | -5.6 | -10.7 | -12.3 | -10.7 | -5.6 | 0.99 | 19CN <sub>4T</sub> | -6.0 | -10.1 | -10.5 | -10.1 | -6.0 | 0.88 |
| 20F <sub>5T</sub> | -6.0 | -11.5 | -13.5 | -11.5 | -6.0 | 0.95 | 20CN <sub>5T</sub> | -5.5 | -9.3  | -9.5  | -9.2  | -5.5 | 0.72 |
| 21F <sub>5T</sub> | -5.9 | -11.2 | -13.4 | -11.2 | -5.9 | 0.96 | 21CN <sub>5T</sub> | -5.2 | -9.0  | -9.4  | -9.0  | -5.2 | 0.74 |
| 22F <sub>5T</sub> | -6.0 | -11.4 | -13.6 | -11.4 | -6.0 | 0.97 | 22CN <sub>5T</sub> | -5.2 | -9.1  | -9.4  | -9.1  | -5.2 | 0.78 |
| 23F <sub>5T</sub> | -5.7 | -11.0 | -13.1 | -11.0 | -5.7 | 0.97 | 23CN <sub>5T</sub> | -5.5 | -9.4  | -9.9  | -9.4  | -5.5 | 0.80 |
| 24F <sub>5T</sub> | -5.5 | -10.7 | -12.7 | -10.7 | -5.5 | 0.97 | 24CN <sub>5T</sub> | -5.4 | -9.1  | -9.5  | -9.1  | -5.4 | 0.78 |
| 25F <sub>6T</sub> | -6.1 | -11.7 | -14.3 | -11.7 | -6.1 | 0.95 | 25CN <sub>6T</sub> | -5.2 | -9.0  | -9.0  | -8.8  | -5.2 | 0.70 |
| 26F <sub>6T</sub> | -5.8 | -11.3 | -13.7 | -11.3 | -5.8 | 0.96 | 26CN <sub>6T</sub> | -5.1 | -8.7  | -8.8  | -8.7  | -5.1 | 0.70 |
| 27F <sub>6T</sub> | -5.9 | -11.5 | -14.1 | -11.5 | -5.9 | 0.96 | 27CN <sub>6T</sub> | -5.0 | -8.6  | -8.8  | -8.6  | -5.0 | 0.73 |
| 28F <sub>6T</sub> | -5.9 | -11.5 | -14.0 | -11.5 | -5.9 | 0.97 | 28CN <sub>6T</sub> | -5.4 | -9.2  | -9.8  | -9.2  | -5.4 | 0.76 |
| 29F <sub>7T</sub> | -6.0 | -11.8 | -14.6 | -11.8 | -6.0 | 0.95 | 29CN <sub>7T</sub> | -4.6 | -8.0  | -8.0  | -8.1  | -4.6 | 0.64 |
| 30F <sub>8T</sub> | -5.9 | -12.0 | -15.1 | -12.0 | -5.9 | 0.94 | 30CN <sub>8T</sub> | -4.3 | -7.7  | -7.2  | -7.7  | -4.3 | 0.62 |

| Comp.              | -2   | -1   | 0    | 1    | 2    | HOMA  | Comp.               | -2   | -1   | 0    | 1    | 2    | HOMA  |
|--------------------|------|------|------|------|------|-------|---------------------|------|------|------|------|------|-------|
| COT <sub>TS</sub>  | 16.3 | 32.5 | 41.0 | 32.5 | 16.3 | -0.22 |                     |      |      |      |      |      |       |
| 2F <sub>1TS</sub>  | 15.0 | 30.1 | 38.0 | 30.1 | 15.0 | -0.17 | 2CN <sub>1TS</sub>  | 15.6 | 31.3 | 39.6 | 31.3 | 15.6 | -0.21 |
| 3F <sub>2TS</sub>  | 14.0 | 28.3 | 35.5 | 28.3 | 14.0 | -0.12 | 3CN <sub>2TS</sub>  | 15.3 | 30.8 | 38.9 | 30.8 | 15.3 | -0.22 |
| 4F <sub>2TS</sub>  | 13.8 | 27.9 | 35.1 | 27.9 | 13.8 | -0.08 | 4CN <sub>2TS</sub>  | 14.7 | 29.7 | 37.7 | 29.7 | 14.7 | -0.19 |
| 5F <sub>2TS</sub>  | 13.7 | 27.9 | 35.0 | 27.9 | 13.7 | -0.15 | 5CN <sub>2TS</sub>  | 15.1 | 30.4 | 38.5 | 30.4 | 15.1 | -0.20 |
| 6F <sub>2TS</sub>  | 13.8 | 28.0 | 35.2 | 28.0 | 13.8 | -0.07 | 6CN <sub>2TS</sub>  | 14.4 | 29.1 | 37.0 | 29.1 | 14.4 | -0.19 |
| 7F <sub>3TS</sub>  | 13.2 | 26.7 | 33.3 | 26.7 | 13.2 | -0.17 | 7CN <sub>3TS</sub>  | 14.6 | 29.6 | 37.4 | 29.6 | 14.6 | -0.24 |
| 8F <sub>3TS</sub>  | 12.9 | 26.2 | 32.7 | 26.2 | 12.9 | -0.08 | 8CN <sub>3TS</sub>  | 14.4 | 29.0 | 36.8 | 29.0 | 14.4 | -0.21 |
| 9F <sub>3TS</sub>  | 12.7 | 25.9 | 32.4 | 25.9 | 12.7 | -0.07 | 9CN <sub>3TS</sub>  | 13.9 | 27.9 | 35.4 | 27.9 | 13.9 | -0.21 |
| 10F <sub>3TS</sub> | 12.7 | 25.8 | 32.4 | 25.8 | 12.7 | 0.04  | 10CN <sub>3TS</sub> | 13.4 | 27.5 | 34.9 | 27.5 | 13.4 | -0.17 |
| 11F <sub>3TS</sub> | 12.6 | 25.6 | 32.0 | 25.6 | 12.6 | -0.11 | 11CN <sub>3TS</sub> | 13.7 | 27.9 | 35.4 | 27.9 | 13.7 | -0.19 |
| 12F <sub>4TS</sub> | 12.1 | 24.7 | 30.7 | 24.7 | 12.1 | -0.14 | 12CN <sub>4TS</sub> | 13.7 | 27.8 | 35.2 | 27.8 | 13.7 | -0.28 |
| 13F <sub>4TS</sub> | 11.8 | 24.2 | 30.0 | 24.2 | 11.8 | -0.10 | 13CN <sub>4TS</sub> | 13.5 | 27.3 | 34.6 | 27.3 | 13.5 | -0.22 |
| 14F <sub>4TS</sub> | 12.1 | 24.6 | 30.5 | 24.6 | 12.1 | -0.16 | 14CN <sub>4TS</sub> | 13.0 | 26.6 | 33.7 | 26.6 | 13.0 | -0.23 |
| 15F <sub>4TS</sub> | 12.2 | 24.8 | 30.7 | 24.8 | 12.2 | -0.16 | 15CN <sub>4TS</sub> | 13.1 | 26.8 | 34.0 | 26.8 | 13.1 | -0.21 |
| 16F <sub>4TS</sub> | 11.9 | 24.3 | 30.1 | 24.3 | 11.9 | -0.03 | 16CN <sub>4TS</sub> | 12.7 | 25.7 | 32.6 | 25.7 | 12.7 | -0.21 |
| 17F <sub>4TS</sub> | 11.6 | 23.8 | 29.6 | 23.8 | 11.6 | 0.00  | 17CN <sub>4TS</sub> | 13.0 | 26.3 | 33.4 | 26.3 | 13.0 | -0.19 |
| 18F <sub>4TS</sub> | 11.6 | 23.8 | 29.6 | 23.8 | 11.6 | -0.07 | 18CN <sub>4TS</sub> | 13.3 | 26.9 | 34.1 | 26.9 | 13.3 | -0.20 |
| 19F <sub>4TS</sub> | 11.6 | 23.9 | 29.8 | 23.9 | 11.6 | 0.17  | 19CN <sub>4TS</sub> | 12.4 | 25.6 | 32.5 | 25.6 | 12.4 | -0.15 |
| 20F <sub>5TS</sub> | 11.4 | 23.3 | 28.7 | 23.3 | 11.4 | -0.19 | 20CN <sub>5TS</sub> | 12.5 | 25.7 | 32.5 | 25.7 | 12.5 | -0.32 |
| 21F <sub>5TS</sub> | 11.0 | 22.6 | 27.8 | 22.6 | 11.0 | -0.10 | 21CN <sub>5TS</sub> | 12.5 | 25.3 | 32.1 | 25.3 | 12.5 | -0.26 |

|                    |      |      |      |      |      |       |                     |      |      |      |      |      |       |
|--------------------|------|------|------|------|------|-------|---------------------|------|------|------|------|------|-------|
| 22F <sub>5TS</sub> | 11.3 | 23.1 | 28.4 | 23.1 | 11.3 | -0.20 | 22CN <sub>5TS</sub> | 12.2 | 24.9 | 31.6 | 24.9 | 12.2 | -0.23 |
| 23F <sub>5TS</sub> | 11.1 | 22.7 | 28.0 | 22.7 | 11.1 | 0.02  | 23CN <sub>5TS</sub> | 12.0 | 24.7 | 31.3 | 24.7 | 12.0 | -0.21 |
| 24F <sub>5TS</sub> | 11.1 | 22.6 | 27.9 | 22.6 | 11.1 | -0.12 | 24CN <sub>5TS</sub> | 12.1 | 25.0 | 31.7 | 25.0 | 12.1 | -0.20 |
| 25F <sub>6TS</sub> | 10.6 | 21.6 | 26.4 | 21.6 | 10.6 | -0.28 | 25CN <sub>6TS</sub> | 12.2 | 24.9 | 31.6 | 24.9 | 12.2 | -0.34 |
| 26F <sub>6TS</sub> | 10.4 | 21.3 | 26.2 | 21.3 | 10.4 | -0.11 | 26CN <sub>6TS</sub> | 11.3 | 23.6 | 29.9 | 23.6 | 11.3 | -0.29 |
| 27F <sub>6TS</sub> | 10.4 | 21.2 | 25.8 | 21.2 | 10.4 | -0.18 | 27CN <sub>6TS</sub> | 11.7 | 24.0 | 30.5 | 24.0 | 11.7 | -0.24 |
| 28F <sub>6TS</sub> | 10.5 | 21.5 | 26.3 | 21.5 | 10.5 | -0.09 | 28CN <sub>6TS</sub> | 11.3 | 23.4 | 29.7 | 23.4 | 11.3 | -0.23 |
| 29F <sub>7TS</sub> | 9.8  | 20.0 | 24.3 | 20.0 | 9.8  | -0.20 | 29CN <sub>7TS</sub> | 10.8 | 22.5 | 28.4 | 22.5 | 10.8 | -0.33 |
| 30F <sub>8TS</sub> | 9.2  | 18.7 | 22.4 | 18.7 | 9.2  | -0.26 | 30CN <sub>8TS</sub> | 10.7 | 21.8 | 27.6 | 21.8 | 10.7 | -0.40 |

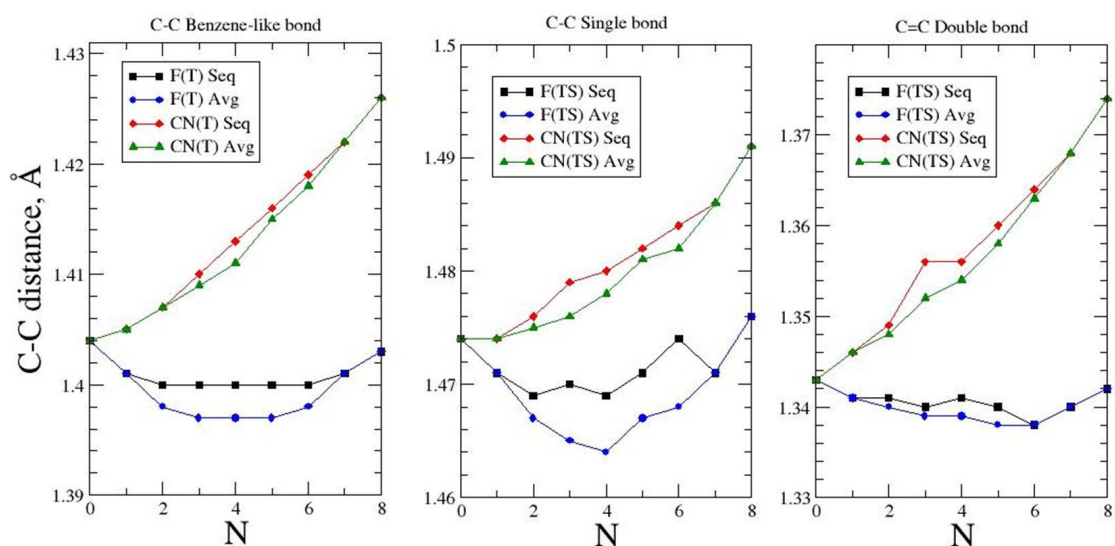

**Figure S1.** Evolution of the C-C distance upon substitution of the ring, for triplet and transition state in F and CN compounds. Sequential substitution (Seq) and average over the distances with the same  $N$  (Avg) are shown.
